# Supplementary material for: DS-8201a, A Novel HER2-Targeting ADC with a Novel DNA Topoisomerase I Inhibitor, Demonstrates a Promising Antitumor Efficacy with Differentiation from T-DM1
Source: Oxford University Press journal article supplement (doi:10.1158/1078-0432.ccr-15-2822), 2016-03-29
Supplement: 10780432ccr152822-sup-158512_2_supp_3407603_846fkw.docx [file 10780432ccr152822-sup-158512_2_supp_3407603_846fkw.docx]

**Supplementaly Table 1**

Histopathological findings in the intestines, bone marrow and lung in the repeated dose study in monkeys

| Organs/tissues | Microscopic findings | Main groups | | | Recovery groups | |
| --- | --- | --- | --- | --- | --- | --- |
| Dose (mg/kg) | | | Dose (mg/kg) | |
| 10 | 30 | 78.8 | 30 | 78.8 |
| Duodenum, Jejunum, Colon, Ileum, Cecum、Rectum | Single cell necrosis (epithelial cell, crypt) | ± | ± | ± - + |  |  |
| Bone marrow (sternum) | Decreased erythroblast  Decreased myelocyte |  |  | 2+  ± - + |  |  |
| Lung | Aggregation of foamy alveolar macrophage  Alveolar edema  Interstitial inflammation (focal)  Karyomegaly/cytomegaly of alveolar and bronchiolar epithelial cells |  |  | 2+  2+  2+  + - 2+ | ±  ±  ± | +  +  +  ± - + |

±: very slight, +: slight, 2+: moderate, 3+: marked
